# Supplementary material
Source: publisher figshare collection journal article supplement (https://acs.figshare.com/ndownloader/files/21005781)
Supplement: Supplementary file 1 [file 21005781]

## Sheet: Sheet1
Table S10. Archival FFPE Tumor Specimen Age and Number of Proteins Identified
Name	Type	Age	Proteins
CM6	MPNST	4.5	4654
CM8	MPNST	3	5009
CM9	MPNST	3	4817
M1	MPNST	8.5	4085
M2	MPNST	4.75	4535
M4	MPNST	4.25	4740
M6	MPNST	5.25	4125
M8	MPNST	7.5	3945
M10	MPNST	8.25	4085
M11	MPNST	9	4190
M13	MPNST	17	4272
M15	MPNST	0.75	4389
M16	MPNST	0.25	4490
MB1	Melanoma	4	4557
MB2	Melanoma	2.5	4821
MB3	Melanoma	2.25	4910
MB6	Melanoma	3.5	4723
MB7	Melanoma	3.5	4860
MN1	Melanoma	3.75	5009
MN2	Melanoma	4.5	4710
MN5	Melanoma	5.5	4971
MN6	Melanoma	3.75	5057
MN8	Melanoma	6.5	4551
SS11	Synovial	2.75	4926
SS13	Synovial	4.75	4768
SS16	Synovial	10	4388
SS17	Synovial	2.75	3945
SS18	Synovial	1.25	4487
SS19	Synovial	1.25	4300
SS21	Synovial	0.75	4730
SS22	Synovial	2.5	3983
SS23	Synovial	2.25	4466
